# Supplementary material for: Co/CoO/CoFe2O4/G nanocomposites derived from layered double hydroxides towards mass production of efficient Pt-free electrocatalysts for oxygen reduction reaction
Source: Royal Society of Chemistry journal article supplement (doi:10.1039/c3nr05352k), 2013-10-28
Supplement: c3nr05352k.pdf [file c3nr05352k.pdf]

## Electronic Supplementary Information

### **Co/CoO/CoFe<sub>2</sub>O<sub>4</sub>/G nanocomposite derived from layered double hydroxide towards mass production of efficient Pt-free electrocatalyst for oxygen reduction reaction**

Rui-Jie Huo,<sup>‡a</sup> Wen-Jie Jiang,<sup>‡b</sup> Sai-Long Xu,<sup>\*a</sup> Fa-Zhi Zhang,<sup>a</sup> and Jin-Song Hu<sup>\*b</sup>

<sup>a</sup> *State Key Laboratory of Chemical Resource Engineering, Beijing University of Chemical Technology, Beijing 100029, China; E-mail: [xusl@mail.buct.edu.cn](mailto:xusl@mail.buct.edu.cn).*

<sup>b</sup> *Institute of Chemistry, Chinese Academy of Sciences, Beijing 100090, China; E-mail: [hujis@iccas.ac.cn](mailto:hujis@iccas.ac.cn).*

<sup>‡</sup> *These authors contributed equally to this work.*

## ***Experimental***

### ***Preparation***

CoFe-LDH/GO precursor was prepared according to a scalable method including as separate nucleation step and an aging step.<sup>1</sup> Briefly, a salt solution were obtained by dissolving  $\text{Co}(\text{NO}_3)_2 \cdot 6\text{H}_2\text{O}$  and  $\text{Fe}(\text{NO}_3)_3 \cdot 9\text{H}_2\text{O}$  in a Co/Fe molar ratio of 2:1 in freshly deionized water to give rise to a solution with a total cationic concentration of 1.2 M. Graphene oxide was dispersed in deionized water and stirred for 12 h to form a homogeneous dispersion. An aqueous base solution was obtained by adding NaOH (1.92 M) and  $\text{Na}_2\text{CO}_3$  (0.8 M) into the GO dispersion. Equal volumes of salt and base solutions were then simultaneously added into a modified colloid mill at a rotor speed set at 3000 rpm. The resulting slurry was mixed for 3 minute and then aged at 100 °C for 48 h. The product was washed thoroughly with deionized water by centrifugation, and finally dried at 60 °C for 24 h to obtain CoFe-LDH/GO.

Co/CoO/CoFe<sub>2</sub>O<sub>4</sub>/G nanocomposite was prepared by calcinating LDH/GO precursors in a programmable tube furnace at 650°C for 2h with a temperature ramping rate of 2°C/min.

### ***Characterization***

Powder X-ray diffraction was carried out on Rigaku XRD-6000 powder diffractometer with  $\text{CuK}\alpha$  radiation (40 kV, 30 mA,  $\lambda=1.542 \text{ \AA}$ ). The data were collected at a scanning speed of  $10^\circ \text{ min}^{-1}$ . Scanning electron microscope (SEM) images were obtained using a Zeiss Supra 55 scanning electron microscope. Samples were dispersed in ethanol and then deposited onto silicon wafer for SEM observation. Transmission electron microscopy (TEM) characterization was performed through a JEOL JEM-2100 electron microscope equipped with STEM and EDX at an accelerating voltage of 200 kV. The X-ray photoelectron spectroscopy (XPS) analyses were conducted through a Kratos Axis ULTRA X-ray Photoelectron Spectrometer incorporating a 165 mm hemispherical electron energy analyzer.

### ***Electrochemical test***

The glass carbon rotating disk electrode (3 mm in diameter, INF-EL-EDI101, France Radiometer Analytical S.A.) was polished mechanically with 0.5~0.7  $\mu\text{m}$  down to 0.03~0.05  $\mu\text{m}$  alumina slurry to obtain a mirror-like surface and then washed with Mill-Q water and ethanol prior to use. In the typical procedure for ink preparation, 2 mg catalysts was dispersed in 400  $\mu\text{L}$  ethanol and sonicated for 30 minutes to form a homogeneous ink. 5  $\mu\text{L}$  ink was loaded on polished glassy carbon electrode to achieve a catalyst loading of 354  $\mu\text{g}/\text{cm}^2$ . A drop of 0.5 wt.% nafion (Sigma-Aldrich) solution was then applied onto electrode surface. After dried in the air, the electrode was ready for test. Commercial

Johnson-Matthey Pt/C with a Pt loading of 20 wt.% was used for comparison and the catalyst loading on electrode was  $15\mu\text{g}/\text{cm}^2_{\text{Pt}}$ .

Electrochemical experiments were conducted in a standard three-electrode cell at room temperature on PARSTAT 2273 advanced electrochemical system, consisted of a working electrode, Ag/AgCl reference electrode and a platinum foil counter electrode, as reported previously in our previous studies.<sup>2,3</sup> All the CV measurements were carried out at a scanning rate of 50 mV/s. The LSV curves were recorded at a scanning rate of 10 mV/s. Before each ORR test, the electrolyte was purged with  $\text{O}_2$  at least for 30 min to achieve  $\text{O}_2$ -saturated electrolyte. RDE measurements were conducted at varying rotating speeds from 400 to 3600 rpm by using CTV101 Speed Control Unit (France Radiometer Analytical S.A.).

The electron transfer number ( $n$ ) per oxygen molecule involved in ORR process can be calculated from the slopes of Koutecky-Levich plots using the following equation<sup>4</sup>:

$$\frac{1}{j} = \frac{1}{j_k} + \frac{1}{B\omega^{1/2}}$$

Where  $j_k$  is the kinetic current and  $\omega$  is the electrode rotating rate.  $B$  could be determined from the slope of the K-L plots based on the Levich equation as follows:

$$B = 0.62nF(D_0)^{2/3}\vartheta^{-1/6}C_0$$

Where  $n$  represents the electron transfer number,  $F$  is the Faraday constant ( $F = 96485\text{ C mol}^{-1}$ ),  $D_0$  is the diffusion coefficient of  $\text{O}_2$  in 0.1 M KOH ( $1.9 \times 10^{-5}\text{ cm}^2\text{ s}^{-1}$ ),  $\vartheta$  is the kinetic viscosity ( $0.01\text{ cm}^2\text{ s}^{-1}$ ), and  $C_0$  is the bulk concentration of  $\text{O}_2$  ( $1.2 \times 10^{-6}\text{ mol cm}^{-3}$ ). The constant 0.62 is adopted when the rotating speed is expressed in  $\text{rad s}^{-1}$ .

## Reference

1. S. Xu, B. Zhang, Z. Chen, J. Yu, D. G. Evans and F. Zhang, *Ind. Eng. Che. Res.*, 2011, **50**, 6567–6572.
2. Y.-P. Xiao, S. Wan, X. Zhang, J.-S. Hu, Z.-D. Wei and L.-J. Wan, *Chem. Commun.*, 2012, **48**, 10331–10333.
3. Y.-P. Xiao, W.-J. Jiang, S. Wan, X. Zhang, J.-S. Hu, Z.-D. Wei and L.-J. Wan, *J. Mater. Chem. A*, 2013, **1**, 7463–7468.
4. S. Wang, D. Yu and L. Dai, *J. Am. Chem. Soc.*, 2011, **133**, 5182–5185.

**Figure S1**

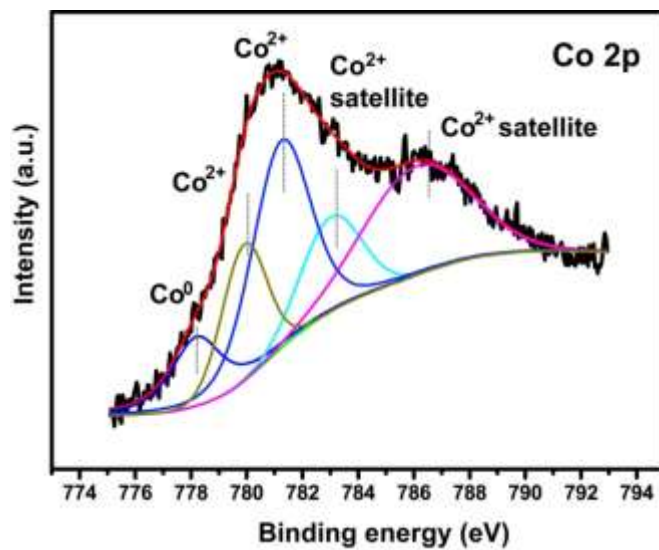

**Fig. S1** Co 2p XPS spectra of Co/CoO/CoFe<sub>2</sub>O<sub>4</sub>/G nanocomposite.

**Figure S2**

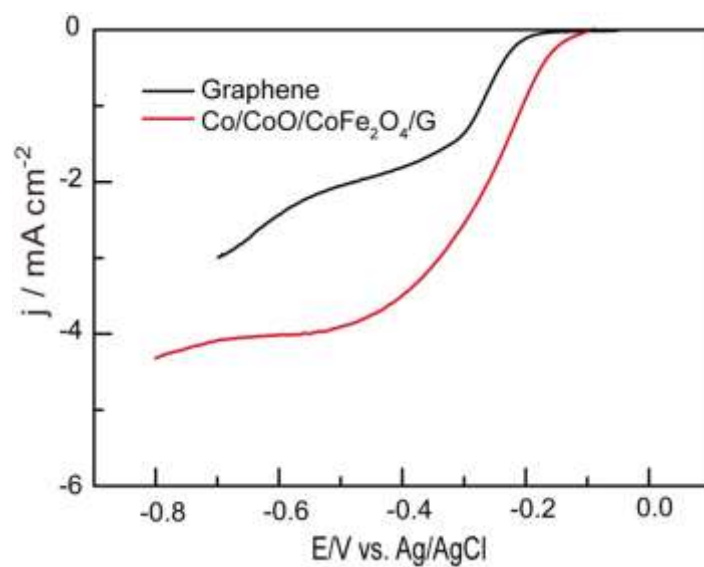

**Fig. S2** LSV curves of pure graphene and Co/CoO/CoFe<sub>2</sub>O<sub>4</sub>/G for ORR recorded at a scan rate of 10  $\text{mV s}^{-1}$  and rotation speed of 1600 rpm

**Figure S3**

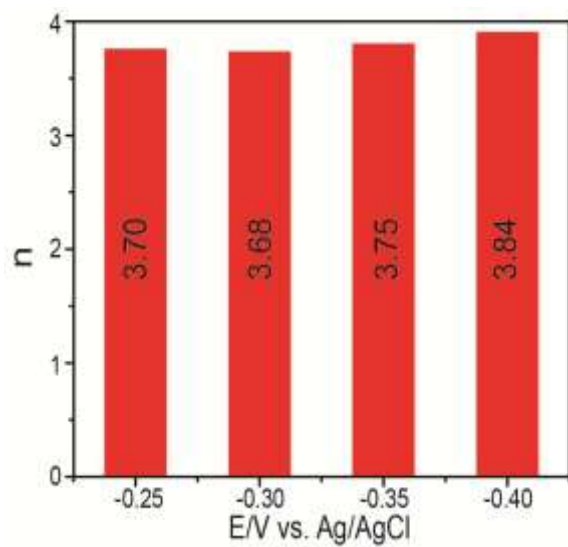

**Fig. S3** The electron transfer numbers ( $n$ ) at various potentials for Co/CoO/CoFe<sub>2</sub>O<sub>4</sub>/G.
